# Supplementary material for: Systematic Review of Nutrition Interventions to Improve Short Term Outcomes in Head and Neck Cancer Patients
Source: MDPI journal article supplement (doi:10.3390/cancers15030822), 2023-01-29
Supplement: s1 [file s1]

# Systematic Review of Nutrition Interventions to Improve Short Term Outcomes in Head and Neck Cancer Patients

Claire Leis, Anna E. Arthur, Xin Chen, Michael W. Greene and Andrew D. Frugé

**Table S1.** Additional characteristics of studies reporting nutrition interventions in patients with head and neck cancers.

|                       | Number, Sex                     | Mean Age                                                 | Tumor Location                                                                                             | Stage                                                                                      | Anti-cancer Treatment                                                                                                    |
|-----------------------|---------------------------------|----------------------------------------------------------|------------------------------------------------------------------------------------------------------------|--------------------------------------------------------------------------------------------|--------------------------------------------------------------------------------------------------------------------------|
| Sandmael et al., 2017 | n = 41 (25 males, 16 females)   | 63.2 years                                               | Nasopharynx, oropharynx, or hypo pharynx, larynx, and oral cavity                                          |                                                                                            | RT only: n = 24; CRT: n = 17                                                                                             |
| Cereda et al., 2018   | n = 159 (114 males, 45 females) | 63.8 year (Control)<br>66.5 year (Intervention)          | Nasopharynx, oral cavity, oropharynx, parotid, hypopharynx, supralottis, larynx, laterocervical, thyroid   | Stage 0: n = 5<br>Stage 1: n = 27<br>Stage 2: n = 44<br>Stage 3: n = 37<br>Stage 4: n = 46 | RT: n = 159 (RT was administered to all patients)<br>Concurrent systemic therapy: n = 61                                 |
| Jiang et al., 2018    | n = 100 (69 males, 31 females)  | 48.18 years                                              | Nasopharyngeal carcinoma                                                                                   | Stage 3: n = 43<br>Stage 4a-b: n = 57                                                      | Induction chemotherapy followed by CRT: n = 100                                                                          |
| Britton et al., 2019  | n = 307 (244 males, 63 females) | 58 years                                                 | Nasopharynx, oropharynx, oral cavity, larynx, or hypopharynx                                               | Stage 1: n = 12<br>Stage 2: n = 39<br>Stage 3: n = 57<br>Stage 4: n = 199                  | Concurrent chemotherapy: n = 147<br>Platinum-based: n = 205<br>Cetuximab: n = 40<br>Postoperative RT: n = 97             |
| Orell et al., 2019    | n = 58 (46 males, 12 females)   | 61 years                                                 | Oral cavity, oropharynx, hypopharynx, nasopharynx, or larynx                                               | Stage 1: n = 2<br>Stage 2: n = 6<br>Stage 3: n = 12<br>Stage 4: n = 27                     | Surgery + Chemoradiotherapy: n = 11<br>Surgery + Radiotherapy: n = 2<br>Chemoradiotherapy: n = 41<br>Radiotherapy: n = 4 |
| Lønbro et al., 2013   | n = 30 (23 males, 7 females)    | Median PROCR group: 56 years; Median PLA group: 59 years | Larynx (except glottic stage I + II), pharynx, oral cavity or in lymph nodes from an unknown primary tumor | Stage 1-2: n = 1<br>Stage 3-4: n = 20                                                      | RT alone: n = 10<br>CRT: n = 20                                                                                          |
| Capozzi et al., 2016  | n = 60 (49 males, 11 females)   | 56.1 ± 9.2                                               | Oral cavity, pharynx, larynx, paranasal sinuses, and salivary glands                                       | Stage 1: n = 1<br>Stage 2: n = 7<br>Stage 3: n = 3<br>Stage 4: n = 48                      | RT alone: n = 15<br>CRT: n = 44                                                                                          |

**Table S2.** Study Quality Assessment.

| Criterion:                                                                                           | Sandmael | Cereda   | Jiang | Britton  | Orell    | Lonbro | Capozzi  | Mean | Standard Deviation |
|------------------------------------------------------------------------------------------------------|----------|----------|-------|----------|----------|--------|----------|------|--------------------|
| 1. Was there research question/hypothesis clearly stated?                                            | 2, 2     | 2, 2     | 2, 2  | 2, 2     | 2, 2     | 2, 2   | 2, 2     | 2.0  | 0.00               |
| 2. Were the inclusion and exclusion criteria clearly stated?                                         | 2, 1 (2) | 1, 1     | 2, 2  | 2, 2     | 2, 2     | 1, 1   | 1, 1     | 1.6  | 0.53               |
| 3. Was a clear aim for the study stated?                                                             | 2, 2     | 2, 2     | 2, 2  | 2, 2     | 2, 2     | 2, 2   | 2, 2     | 2.0  | 0.00               |
| 4. Were the methods of the study clearly described?                                                  | 2, 2     | 2, 2     | 2, 2  | 2, 2     | 2, 2     | 2, 2   | 2, 2     | 2.0  | 0.00               |
| 5. Were the main findings (results) of the study clearly described?                                  | 2, 2     | 2, 2     | 2, 2  | 1, 2 (2) | 2, 2     | 2, 2   | 2, 2     | 2.0  | 0.00               |
| 6. Were study limitations discussed?                                                                 | 2, 2     | 2, 2     | 2, 2  | 2, 2     | 1, 1     | 2, 2   | 2, 2     | 1.9  | 0.38               |
| 7. Were outcomes (nutrition status, QOL, or treatment tolerance) identified via a validated measure? | 2, 2     | 2, 2     | 2, 2  | 2, 2     | 2, 2     | 2, 2   | 2, 2     | 2.0  | 0.00               |
| 8. Was a sample size justification via power analysis provided?                                      | 1, 0 (1) | 2, 0 (2) | 0, 0  | 2, 0 (2) | 1, 2 (2) | 2, 2   | 1, 0 (0) | 1.3  | 0.95               |
| 9. Are data analyses discussed?                                                                      | 2, 2     | 2, 2     | 2, 2  | 2, 2     | 2, 2     | 2, 2   | 2, 2     | 2.0  | 0.00               |
| <b>Total Score:</b>                                                                                  | 17       | 17       | 16    | 18       | 17       | 17     | 15       |      |                    |

Scores for each criterion range from 0 to 2, depending on whether the criterion was unmentioned or unmet (0), partially met (1), or completely met (2). Reviewer 1 and 2 scores are listed with Reviewer 3 scores in parentheses for resolving discrepancies. The possible total study score ranges between 0 and 18. Higher total scores represent better quality.

| Product Name: |                       | Produced By:                | Calories and Protein Provided: |
|---------------|-----------------------|-----------------------------|--------------------------------|
| Sandmael:     | E+                    | Tine SA, Oslo, Norway       | 350 kcal, 7.5 g protein        |
| Cereda        | Resource Support Plus | Nestlé Health Science       | 500 kcal, 23 g protein         |
| Jiang         | Niufutai              | EnterNutr, Guangdong, China | 402 kcal, 18 g protein         |
| Lonbro        | In2Zym WPC80          | LinusPro, Risskov, Denmark  | 120 kcal, 30 g protein         |

Search: (((Nutrition Intervention) OR (Nutrition Counseling)) AND (Cancer)) AND (Head and neck cancer) AND (randomizedcontrolledtrial[Filter])

Web of Science Search terms:

Embase Search terms:

'nutrition intervention' AND ('head and neck cancer'/exp OR 'head and neck cancer')
